# Supplementary material for: Nanoconstruction of curcuminoid boron difluoride dyes with aggregation-induced emission for bright near-infrared fluorescence imaging of malignant tumor
Source: Royal Society of Chemistry journal article supplement (doi:10.1039/d4nj01682c), 2024-01-01
Supplement: d4nj01682c1.pdf [file d4nj01682c1.pdf]

## Supplementary Information

# Nanoconstruction of curcuminoid boron difluoride dyes with aggregation-induced emission for bright near-infrared fluorescence imaging of malignant tumor

Ziwei Zhao, Susu Yan and Yanan Li\*

College of Medical Imaging, Shanxi Medical University, Taiyuan 030001, Shanxi, People's Republic of China

\* Author to whom correspondence should be sent

E-mail: [liyanan0213@sxmu.edu.cn](mailto:liyanan0213@sxmu.edu.cn)

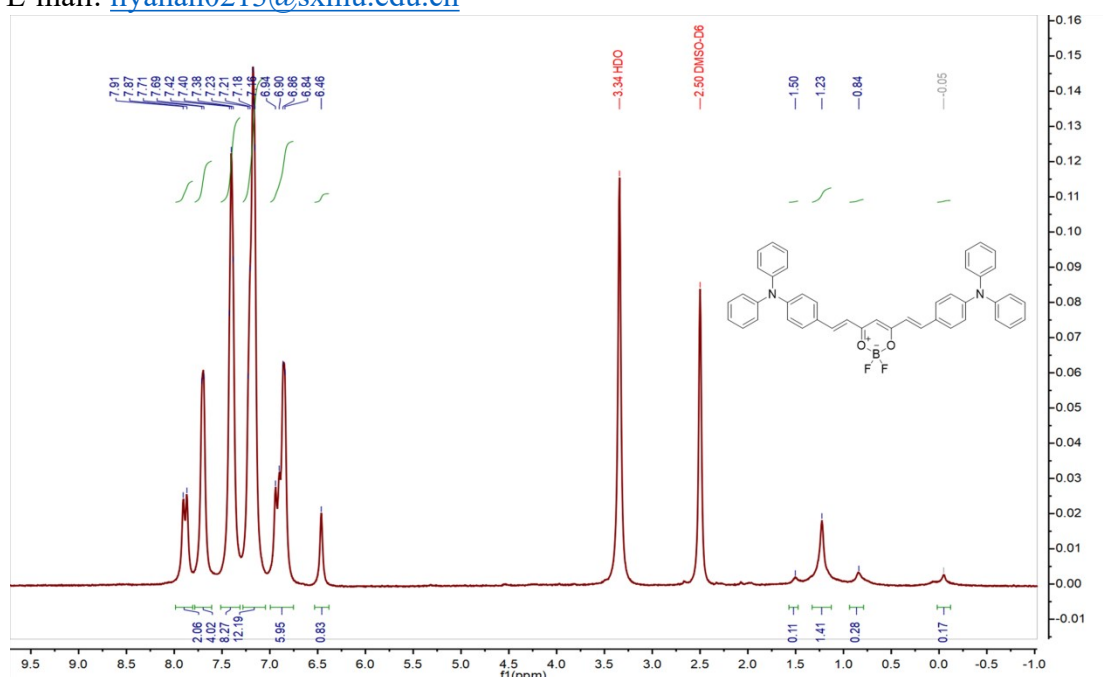

Fig. S1 <sup>1</sup>H NMR spectra of Curc-TPA.

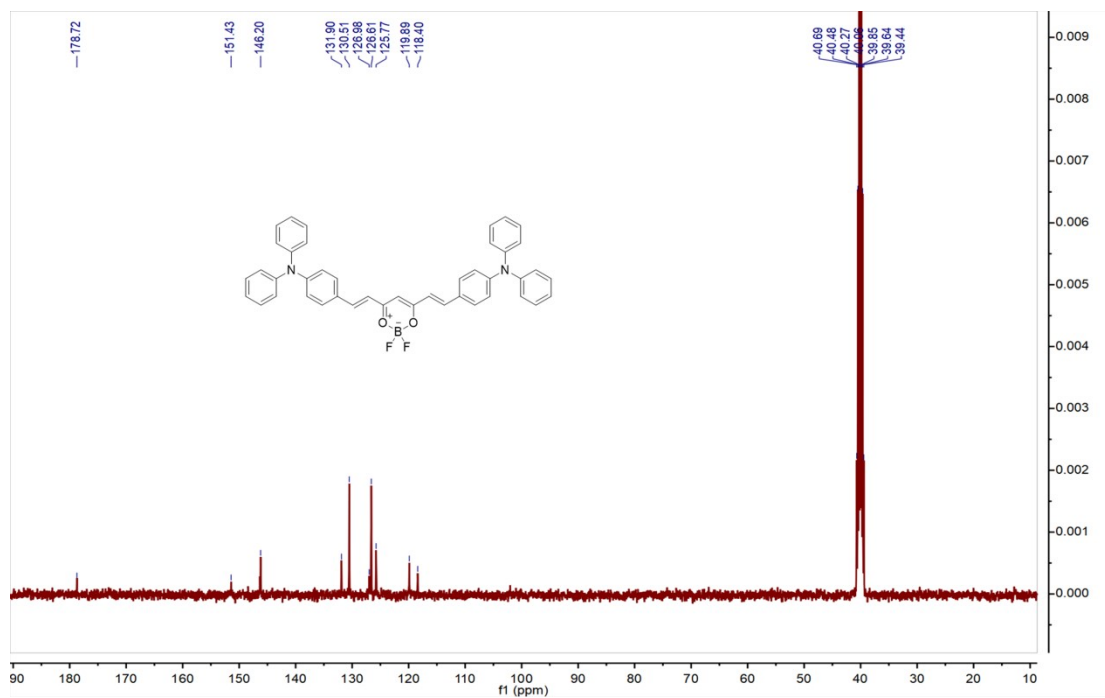

Fig. S2 <sup>13</sup>C NMR spectra of Curc-TPA.
